# Supplementary material for: Photoluminescent F-doped carbon dots prepared by ring-opening reaction for gene delivery and cell imaging
Source: PubMed Central journal article supplement (PMC9078219; doi:10.1039/c7ra13607b), 2018-02-07
Supplement: RA-008-C7RA13607B-s001.pdf [file RA-008-C7RA13607B-s001.pdf]

## Supplementary Information

### Photoluminescent F-doped Carbon Dots Prepared by Ring-Opening Reaction for Gene Delivery and Cell Imaging

Tian-Ying Luo, Xi He, Ji Zhang\*, Ping Chen, Yan-Hong Liu, Hai-Jiao Wang and Xiao-Qi Yu\*

*Key Laboratory of Green Chemistry and Technology (Ministry of Education), College of Chemistry, Sichuan University, Chengdu 610064, P. R. China*

\*Corresponding authors: jzhang@scu.edu.cn (J. Zhang); xqyu@scu.edu.cn (X.-Q. Yu).

#### Tables and figures

**Table 1.** The C, N and H of content of CDs by elemental analysis

|             | N(%) | C(%) | H(%) |
|-------------|------|------|------|
| <b>C-6H</b> | 14.4 | 55.9 | 11.9 |
| <b>C-6F</b> | 13.8 | 46.4 | 7.6  |

**Table 2.** Quantum yield (QY) of CDs using quinine sulfate as a reference.

|             | $F_{\text{CDs}}$ | $A_{\text{CDs}}$ | QY   |
|-------------|------------------|------------------|------|
| <b>C-6H</b> | 244722.9395      | 0.044            | 6.6% |
| <b>C-6F</b> | 186586.6375      | 0.040            | 5.6% |

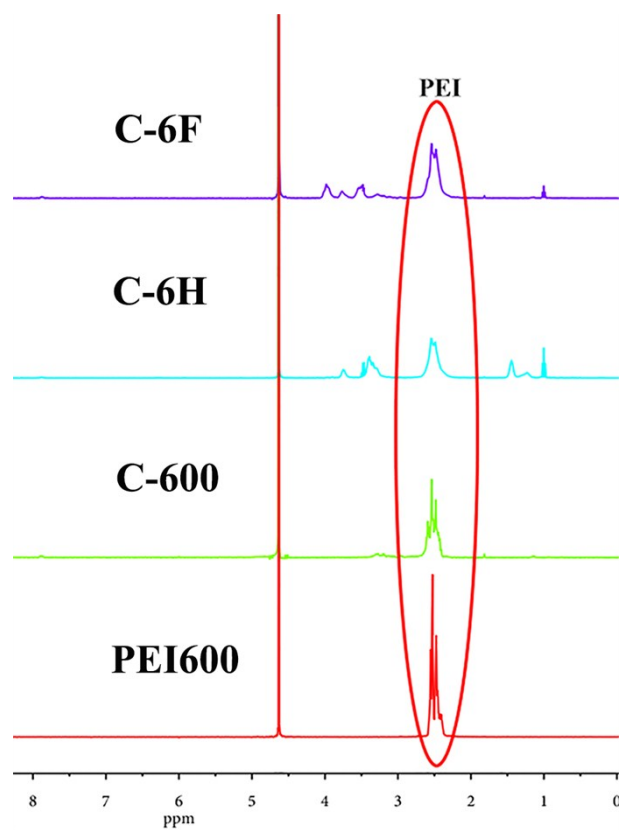

**Fig. S1.** <sup>1</sup>H NMR spectra of the CDs

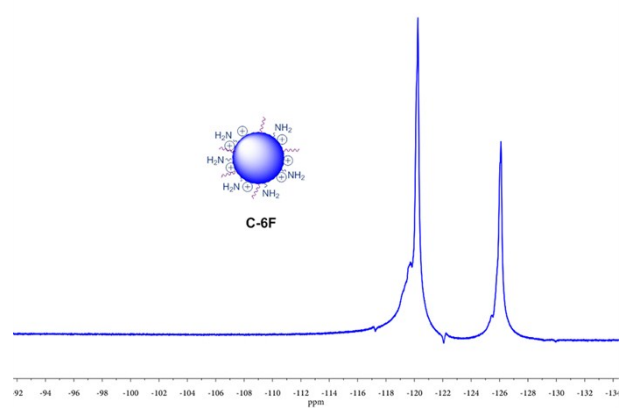

**Fig. S2.** <sup>19</sup>F NMR spectrum of C-6F.

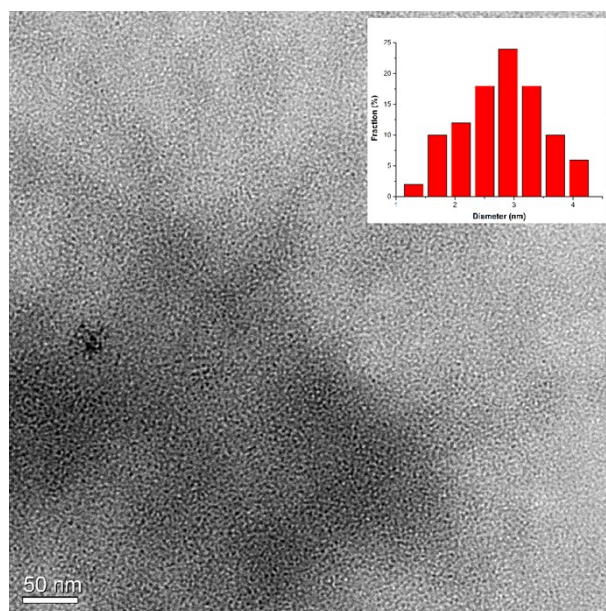

**Fig. S3.** TEM image of C-6H.

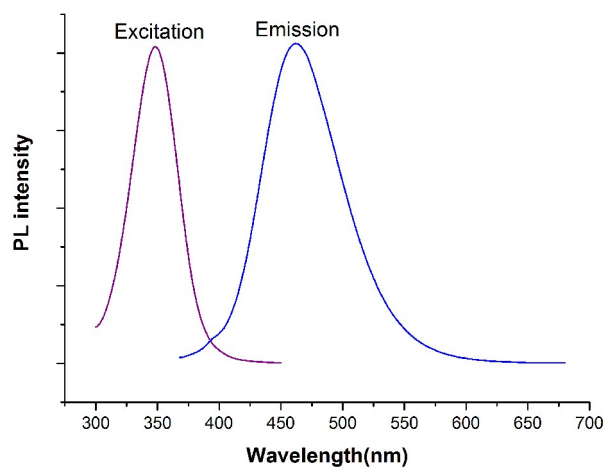

**Fig. S4.** Luminescence excitation (purple) and emission spectra (blue) of C-6H

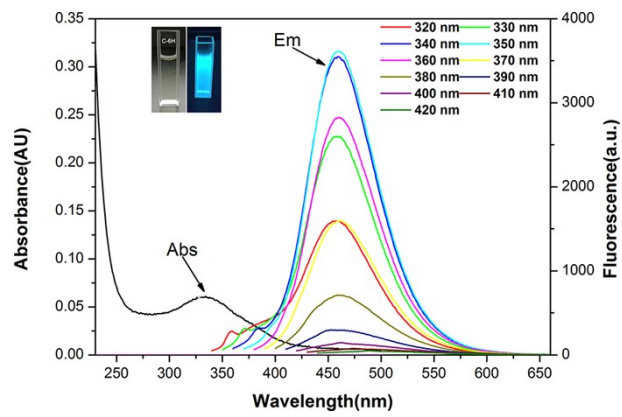

**Fig. S5.** Absorption curves (Abs) and PL emission spectra (Em) under excitation with light of different wavelengths (C-6H aqueous solution under daylight (left) and UV light in the inset.)

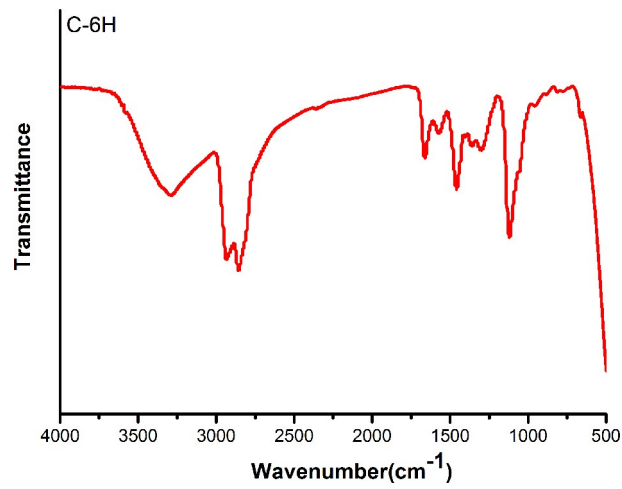

**Fig. S6.** FT-IR spectrum of C-6H.

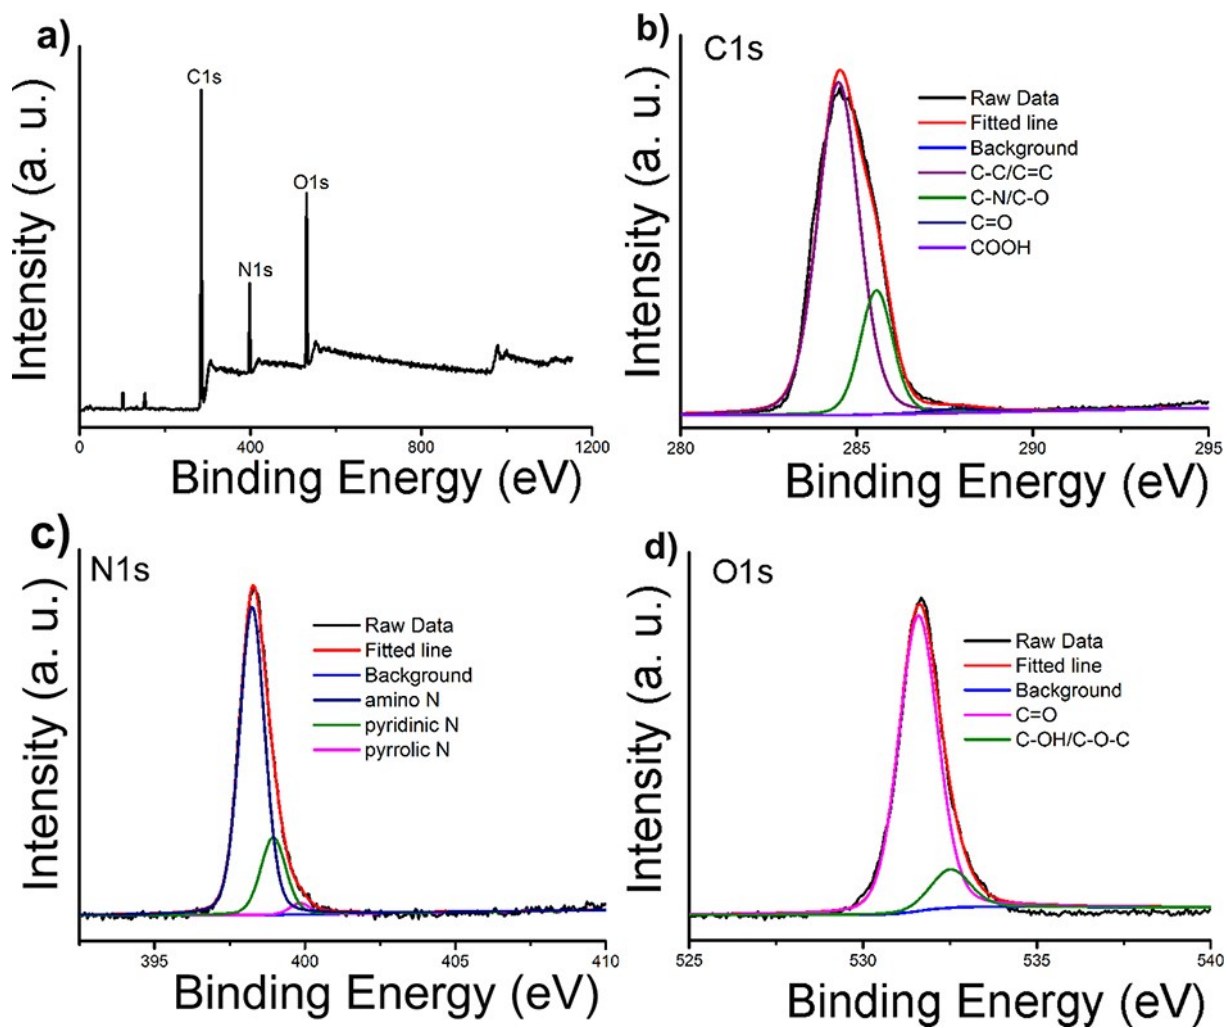

Fig. S7. (a) XPS survey; and (b–e) high resolution XPS spectra of C 1s, N 1s, O 1s of C-6H.

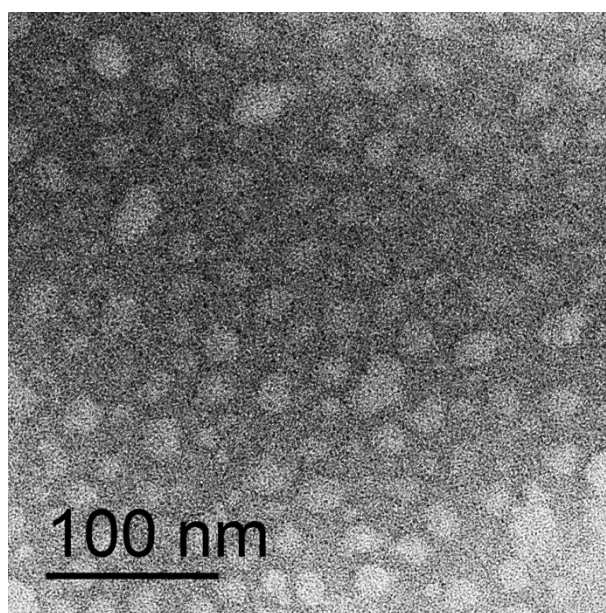

Fig. S8. TEM images of C-6F/DNA complexes at a mass ratio of 6.0 in deionized water

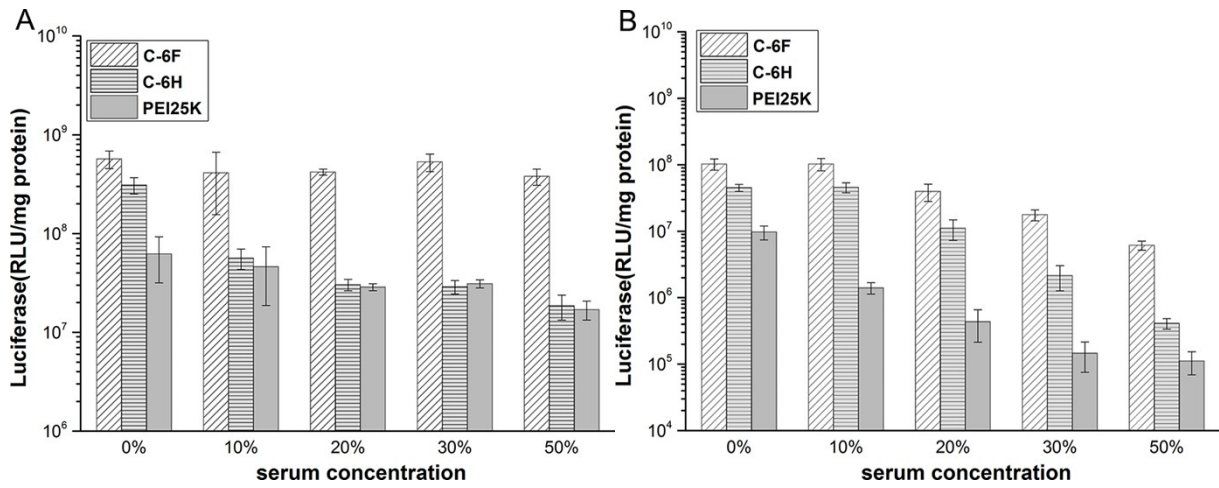

**Fig. S9.** Luciferase gene expression transfected by **C-6H** and **C-6F** derived complexes (w/w = 6) under various serum concentrations in comparison with 25 kDa PEI (w/w = 1.4). Transfections were carried out in 7702 (A) and HeLa (B) cells. Data shows the representative mean SD (n = 3).
